# Supplementary material for: Description of Genetic Variants in BRCA Genes in Mexican Patients with Ovarian Cancer: A First Step towards Implementing Personalized Medicine
Source: MDPI journal article supplement (doi:10.3390/genes9070349), 2018-07-11
Supplement: s1 [file s1]

Table S1. Pathogenic variants found in both *BRCA* genes per sample and its histological tumor type.

| Gene         | SNP        | Patient number/histological tumor type |                       |                 |                  |                     |               |
|--------------|------------|----------------------------------------|-----------------------|-----------------|------------------|---------------------|---------------|
|              |            | 2/High-grade serous                    | 14/ High-grade serous | 16/Endometrioid | 36/ Endometrioid | 13/Low-grade serous | 22/Clear cell |
| <i>BRCA1</i> | rs80356862 |                                        | 59 years              |                 |                  |                     |               |
|              | rs80358027 |                                        |                       | 41 years        |                  |                     |               |
|              | rs80357260 |                                        |                       |                 | 68 years         |                     |               |
|              | rs80357284 |                                        |                       |                 |                  |                     |               |
|              | rs80357219 |                                        |                       |                 |                  |                     |               |
| <i>BRCA2</i> | rs80359082 | 55 years                               |                       |                 |                  |                     |               |
|              | rs80358557 |                                        |                       |                 |                  | 33 years            |               |
|              | rs80359775 |                                        |                       |                 |                  |                     | 43 years      |
|              | rs80358981 |                                        |                       |                 |                  |                     |               |
